# Supplementary material for: Associations between Chronic Kidney Disease and Migraine Incidence: Findings from a Korean Longitudinal Big Data Study
Source: MDPI journal article supplement (doi:10.3390/jpm14040356), 2024-03-28
Supplement: s1 [file s1]

**Supplementary Table S1.** Subgroup analyses of crude and overlap propensity score weighted hazard ratios (95% confidence interval) of CKD for overall migraines

|                                    | N of event /<br>N of total (%) | Follow-up<br>duration (PY) | IR per<br>1000<br>(PY) | IRD<br>(95% CI)        | Hazard ratios for migraine |         |                             |         |
|------------------------------------|--------------------------------|----------------------------|------------------------|------------------------|----------------------------|---------|-----------------------------|---------|
|                                    |                                |                            |                        |                        | Crude                      | P-value | Overlap weighted<br>model † | P-value |
| Underweight                        |                                |                            |                        |                        |                            |         |                             |         |
| CKD                                | 8 / 399 (2.01)                 | 1,220                      | 6.56                   | 0.40 (-4.32 to 5.12)   | 0.95 (0.45-2.01)           | 0.9     | 0.93 (0.55-1.58)            | 0.785   |
| Control                            | 54 / 2,006 (2.69)              | 8,766                      | 6.16                   |                        | 1                          |         | 1                           |         |
| Normal weight                      |                                |                            |                        |                        |                            |         |                             |         |
| CKD                                | 105 / 4,735 (2.22)             | 19,220                     | 5.46                   | -0.57 (-1.75 to 0.61)  | 0.87 (0.71-1.07)           | 0.193   | 0.91 (0.79-1.06)            | 0.23    |
| Control                            | 678 / 22,085 (3.07)            | 112,451                    | 6.03                   |                        | 1                          |         | 1                           |         |
| Overweight                         |                                |                            |                        |                        |                            |         |                             |         |
| CKD                                | 97 / 4,032 (2.41)              | 18,056                     | 5.37                   | -0.86 (-2.11 to 0.39)  | 0.84 (0.68-1.04)           | 0.115   | 0.85 (0.72-1.00)            | 0.049*  |
| Control                            | 541 / 16,509 (3.28)            | 86,810                     | 6.23                   |                        | 1                          |         | 1                           |         |
| Obese                              |                                |                            |                        |                        |                            |         |                             |         |
| CKD                                | 139 / 6,277 (2.21)             | 26,656                     | 5.21                   | -0.50 (-1.50 to 0.50)  | 0.88 (0.73-1.05)           | 0.162   | 0.89 (0.76-1.03)            | 0.116   |
| Control                            | 628 / 21,172 (2.97)            | 109,898                    | 5.71                   |                        | 1                          |         | 1                           |         |
| Non-smoker                         |                                |                            |                        |                        |                            |         |                             |         |
| CKD                                | 249 / 9,726 (2.56)             | 42,535                     | 5.85                   | -0.81 (-1.65 to 0.04)  | 0.85 (0.75-0.98)           | 0.021*  | 0.88 (0.79-0.98)            | 0.015*  |
| Control                            | 1,380 / 39,481 (3.50)          | 207,278                    | 6.66                   |                        | 1                          |         | 1                           |         |
| Past and current smoker            |                                |                            |                        |                        |                            |         |                             |         |
| CKD                                | 100 / 5,717 (1.75)             | 22,617                     | 4.42                   | -0.29 (-1.26 to 0.69)  | 0.89 (0.72-1.11)           | 0.308   | 0.89 (0.76-1.06)            | 0.187   |
| Control                            | 521 / 22,291 (2.34)            | 110,647                    | 4.71                   |                        | 1                          |         | 1                           |         |
| Alcohol consumption <1 time a week |                                |                            |                        |                        |                            |         |                             |         |
| CKD                                | 274 / 11,104 (2.47)            | 47,755                     | 5.74                   | -0.83 (-1.62 to -0.04) | 0.84 (0.74-0.96)           | 0.009*  | 0.87 (0.78-0.96)            | 0.006*  |
| Control                            | 1,452 / 42,476 (3.42)          | 221,082                    | 6.57                   |                        | 1                          |         | 1                           |         |
| Alcohol consumption ≥1 time a week |                                |                            |                        |                        |                            |         |                             |         |
| CKD                                | 75 / 4,339 (1.73)              | 17,397                     | 4.31                   | -0.33 (-1.42 to 0.77)  | 0.90 (0.71-1.15)           | 0.411   | 0.94 (0.79-1.13)            | 0.537   |
| Control                            | 449 / 19,296 (2.33)            | 96,843                     | 4.64                   |                        | 1                          |         | 1                           |         |
| SBP < 140 mmHg and DBP < 90 mmHg   |                                |                            |                        |                        |                            |         |                             |         |
| CKD                                | 225 / 10,098 (2.23)            | 41,001                     | 5.49                   | -0.71 (-1.53 to 0.11)  | 0.85 (0.74-0.98)           | 0.026*  | 0.86 (0.77-0.95)            | 0.004*  |

|                                           |                       |         |      |                        |                  |        |                  |        |
|-------------------------------------------|-----------------------|---------|------|------------------------|------------------|--------|------------------|--------|
| Control                                   | 1,393 / 44,849 (3.11) | 224,695 | 6.20 |                        | 1                |        | 1                |        |
| SBP $\geq$ 140 mmHg or DBP $\geq$ 90 mmHg |                       |         |      |                        |                  |        |                  |        |
| CKD                                       | 124 / 5,345 (2.32)    | 24,151  | 5.13 | -0.32 (-1.35 to 0.72)  | 0.91 (0.75-1.11) | 0.344  | 0.94 (0.80-1.10) | 0.444  |
| Control                                   | 508 / 16,923 (3.00)   | 93,230  | 5.45 |                        | 1                |        | 1                |        |
| Fasting blood glucose < 100 mg/dL         |                       |         |      |                        |                  |        |                  |        |
| CKD                                       | 191 / 7,168 (2.66)    | 32,666  | 5.85 | -0.71 (-1.65 to 0.23)  | 0.86 (0.74-1.00) | 0.056  | 0.85 (0.76-0.95) | 0.005* |
| Control                                   | 1,240 / 34,115 (3.63) | 189,096 | 6.56 |                        | 1                |        | 1                |        |
| Fasting blood glucose $\geq$ 100 mg/dL    |                       |         |      |                        |                  |        |                  |        |
| CKD                                       | 158 / 8,275 (1.91)    | 32,486  | 4.86 | -0.27 (-1.13 to 0.60)  | 0.92 (0.77-1.09) | 0.344  | 0.94 (0.82-1.08) | 0.391  |
| Control                                   | 661 / 27,657 (2.39)   | 128,829 | 5.13 |                        | 1                |        | 1                |        |
| Total cholesterol < 200 mg/dL             |                       |         |      |                        |                  |        |                  |        |
| CKD                                       | 202 / 9,557 (2.11)    | 37,479  | 5.39 | -0.44 (-1.29 to 0.41)  | 0.89 (0.76-1.03) | 0.12   | 0.92 (0.82-1.04) | 0.189  |
| Control                                   | 1,033 / 36,303 (2.85) | 177,197 | 5.83 |                        | 1                |        | 1                |        |
| Total cholesterol $\geq$ 200 mg/dL        |                       |         |      |                        |                  |        |                  |        |
| CKD                                       | 147 / 5,886 (2.50)    | 27,673  | 5.31 | -0.86 (-1.86 to 0.14)  | 0.84 (0.70-1.00) | 0.049* | 0.86 (0.75-0.97) | 0.019* |
| Control                                   | 868 / 25,469 (3.41)   | 140,728 | 6.17 |                        | 1                |        | 1                |        |
| CCI scores = 0                            |                       |         |      |                        |                  |        |                  |        |
| CKD                                       | 113 / 4,527 (2.50)    | 21,109  | 5.35 | -0.14 (-1.19 to 0.92)  | 0.96 (0.79-1.16) | 0.667  | 0.96 (0.85-1.09) | 0.544  |
| Control                                   | 976 / 33,694 (2.90)   | 177,929 | 5.49 |                        | 1                |        | 1                |        |
| CCI scores = 1                            |                       |         |      |                        |                  |        |                  |        |
| CKD                                       | 57 / 2,613 (2.18)     | 10,574  | 5.39 | -1.23 (-2.89 to 0.44)  | 0.78 (0.59-1.03) | 0.085  | 0.82 (0.67-1.00) | 0.054  |
| Control                                   | 382 / 11,149 (3.43)   | 57,730  | 6.62 |                        | 1                |        | 1                |        |
| CCI scores $\geq$ 2                       |                       |         |      |                        |                  |        |                  |        |
| CKD                                       | 179 / 8,303 (2.16)    | 33,469  | 5.35 | -1.25 (-2.26 to -0.25) | 0.78 (0.66-0.92) | 0.004* | 0.83 (0.71-0.97) | 0.018* |
| Control                                   | 543 / 16,929 (3.21)   | 82,266  | 6.60 |                        | 1                |        | 1                |        |

Abbreviation: CKD, chronic kidney disease; IR, incidence rate; IRD, incidence rate difference; PY, person-year; HR, hazard ratio; CI, confidence interval

\*Significance at  $p < 0.05$ . <sup>†</sup>Adjusted for age, sex, income, region of residence, obesity, smoking, alcohol consumption, systolic blood pressure, diastolic blood pressure, fasting blood glucose, total cholesterol, and Charlson Comorbidity Index scores

**Supplementary Table S2.** Subgroup analyses of crude and overlap propensity score weighted hazard ratios (95% confidence interval) of CKD for migraine with aura

|                                    | N of event /<br>N of total (%) | Follow-up<br>duration (PY) | IR per<br>1000<br>(PY) | IRD<br>(95% CI)       | Hazard ratios for Migraine with Aura |         |                             |         |
|------------------------------------|--------------------------------|----------------------------|------------------------|-----------------------|--------------------------------------|---------|-----------------------------|---------|
|                                    |                                |                            |                        |                       | Crude                                | P-value | Overlap weighted<br>model † | P-value |
| Underweight                        |                                |                            |                        |                       |                                      |         |                             |         |
| CKD                                | 0 / 399 (0.00)                 | 1,256                      | 0.00                   | -1.11 (-2.96 to 0.73) | N/A                                  |         | N/A                         |         |
| Control                            | 10 / 2,006 (0.50)              | 8,985                      | 1.11                   |                       | 1                                    |         | 1                           |         |
| Normal weight                      |                                |                            |                        |                       |                                      |         |                             |         |
| CKD                                | 3 / 4,735 (0.06)               | 19,764                     | 0.15                   | -0.28 (-0.58 to 0.02) | 0.34 (0.10-1.08)                     | 0.067   | 0.38 (0.18-0.79)            | 0.009*  |
| Control                            | 50 / 22,085 (0.23)             | 115,979                    | 0.43                   |                       | 1                                    |         | 1                           |         |
| Overweight                         |                                |                            |                        |                       |                                      |         |                             |         |
| CKD                                | 7 / 4,032 (0.17)               | 18,566                     | 0.38                   | 0.05 (-0.25 to 0.33)  | 1.07 (0.47-2.44)                     | 0.871   | 1.19 (0.62-2.26)            | 0.606   |
| Control                            | 30 / 16,509 (0.18)             | 89,755                     | 0.33                   |                       | 1                                    |         | 1                           |         |
| Obese                              |                                |                            |                        |                       |                                      |         |                             |         |
| CKD                                | 6 / 6,277 (0.10)               | 27,396                     | 0.22                   | -0.17 (-0.42 to 0.08) | 0.52 (0.22-1.23)                     | 0.138   | 0.69 (0.36-1.33)            | 0.27    |
| Control                            | 44 / 21,172 (0.21)             | 113,308                    | 0.39                   |                       | 1                                    |         | 1                           |         |
| Non-smoker                         |                                |                            |                        |                       |                                      |         |                             |         |
| CKD                                | 12 / 9,726 (0.12)              | 43,940                     | 0.27                   | -0.18 (-0.39 to 0.03) | 0.58 (0.32-1.05)                     | 0.072   | 0.67 (0.43-1.03)            | 0.071   |
| Control                            | 97 / 39,481 (0.25)             | 214,754                    | 0.45                   |                       | 1                                    |         | 1                           |         |
| Past and current smoker            |                                |                            |                        |                       |                                      |         |                             |         |
| CKD                                | 4 / 5,717 (0.07)               | 23,042                     | 0.17                   | -0.16 (-0.40 to 0.09) | 0.48 (0.17-1.36)                     | 0.167   | 0.55 (0.26-1.13)            | 0.104   |
| Control                            | 37 / 22,291 (0.17)             | 113,273                    | 0.33                   |                       | 1                                    |         | 1                           |         |
| Alcohol consumption <1 time a week |                                |                            |                        |                       |                                      |         |                             |         |
| CKD                                | 14 / 11,104 (0.13)             | 49,206                     | 0.28                   | -0.18 (-0.38 to 0.02) | 0.58 (0.33-1.01)                     | 0.054   | 0.70 (0.46-1.05)            | 0.087   |
| Control                            | 106 / 42,476 (0.25)            | 229,050                    | 0.46                   |                       | 1                                    |         | 1                           |         |
| Alcohol consumption ≥1 time a week |                                |                            |                        |                       |                                      |         |                             |         |
| CKD                                | 2 / 4,339 (0.05)               | 17,776                     | 0.11                   | -0.17 (-0.43 to 0.09) | 0.38 (0.09-1.58)                     | 0.182   | 0.39 (0.15-0.99)            | 0.048*  |
| Control                            | 28 / 19,296 (0.15)             | 98,977                     | 0.28                   |                       | 1                                    |         | 1                           |         |
| SBP < 140 mmHg and DBP < 90 mmHg   |                                |                            |                        |                       |                                      |         |                             |         |
| CKD                                | 13 / 10,098 (0.13)             | 42,075                     | 0.31                   | -0.17 (-0.40 to 0.05) | 0.60 (0.34-1.07)                     | 0.082   | 0.66 (0.44-0.98)            | 0.041*  |
| Control                            | 112 / 44,849 (0.25)            | 231,883                    | 0.48                   |                       | 1                                    |         | 1                           |         |
| SBP ≥ 140 mmHg or DBP ≥ 90 mmHg    |                                |                            |                        |                       |                                      |         |                             |         |
| CKD                                | 3 / 5,345 (0.06)               | 24,907                     | 0.12                   | -0.11 (-0.31 to 0.09) | 0.49 (0.15-1.64)                     | 0.248   | 0.60 (0.24-1.48)            | 0.266   |
| Control                            | 22 / 16,923 (0.13)             | 96,144                     | 0.23                   |                       | 1                                    |         | 1                           |         |
| Fasting blood glucose < 100 mg/dL  |                                |                            |                        |                       |                                      |         |                             |         |
| CKD                                | 12 / 7,168 (0.17)              | 33,751                     | 0.36                   | -0.09 (-0.33 to 0.15) | 0.75 (0.41-1.38)                     | 0.359   | 0.80 (0.52-1.24)            | 0.317   |
| Control                            | 88 / 34,115 (0.26)             | 195,984                    | 0.45                   |                       | 1                                    |         | 1                           |         |

|                                        |                    |         |      |                        |                  |        |                  |        |
|----------------------------------------|--------------------|---------|------|------------------------|------------------|--------|------------------|--------|
| Fasting blood glucose $\geq$ 100 mg/dL |                    |         |      |                        |                  |        |                  |        |
| CKD                                    | 4 / 8,275 (0.05)   | 33,231  | 0.12 | -0.23 (-0.44 to -0.02) | 0.32 (0.12-0.90) | 0.03*  | 0.37 (0.18-0.76) | 0.007* |
| Control                                | 46 / 27,657 (0.17) | 132,043 | 0.35 |                        | 1                |        | 1                |        |
| Total cholesterol $<$ 200 mg/dL        |                    |         |      |                        |                  |        |                  |        |
| CKD                                    | 10 / 9,557 (0.10)  | 38,492  | 0.26 | -0.13 (-0.34 to 0.08)  | 0.62 (0.32-1.20) | 0.157  | 0.74 (0.45-1.22) | 0.238  |
| Control                                | 71 / 36,303 (0.20) | 182,644 | 0.39 |                        | 1                |        | 1                |        |
| Total cholesterol $\geq$ 200 mg/dL     |                    |         |      |                        |                  |        |                  |        |
| CKD                                    | 6 / 5,886 (0.10)   | 28,490  | 0.21 | -0.22 (-0.48 to 0.03)  | 0.47 (0.20-1.08) | 0.074  | 0.53 (0.30-0.94) | 0.03*  |
| Control                                | 63 / 25,469 (0.25) | 145,383 | 0.43 |                        | 1                |        | 1                |        |
| CCI scores = 0                         |                    |         |      |                        |                  |        |                  |        |
| CKD                                    | 6 / 4,527 (0.13)   | 21,680  | 0.28 | -0.08 (-0.34 to 0.18)  | 0.75 (0.33-1.74) | 0.507  | 0.74 (0.44-1.24) | 0.252  |
| Control                                | 65 / 33,694 (0.19) | 183,030 | 0.36 |                        | 1                |        | 1                |        |
| CCI scores = 1                         |                    |         |      |                        |                  |        |                  |        |
| CKD                                    | 4 / 2,613 (0.15)   | 10,850  | 0.37 | -0.15 (-0.60 to 0.31)  | 0.66 (0.23-1.87) | 0.431  | 0.70 (0.33-1.50) | 0.357  |
| Control                                | 31 / 11,149 (0.28) | 59,834  | 0.52 |                        | 1                |        | 1                |        |
| CCI scores $\geq$ 2                    |                    |         |      |                        |                  |        |                  |        |
| CKD                                    | 6 / 8,303 (0.07)   | 34,452  | 0.17 | -0.28 (-0.51 to -0.03) | 0.37 (0.16-0.87) | 0.023* | 0.44 (0.21-0.92) | 0.028* |
| Control                                | 38 / 16,929 (0.22) | 85,163  | 0.45 |                        | 1                |        | 1                |        |

Abbreviation: CKD, chronic kidney disease; IR, incidence rate; IRD, incidence rate difference; PY, person-year; HR, hazard ratio; CI, confidence interval

\*Significance at  $p < 0.05$ . <sup>†</sup>Adjusted for age, sex, income, region of residence, obesity, smoking, alcohol consumption, systolic blood pressure, diastolic blood pressure, fasting blood glucose, total cholesterol, and Charlson Comorbidity Index scores

**Supplementary Table S3.** Subgroup analyses of crude and overlap propensity score weighted hazard ratios (95% confidence interval) of CKD for migraine without aura

|                                    | N of event /<br>N of total (%) | Follow-up<br>duration (PY) | IR per<br>1000<br>(PY) | IRD<br>(95% CI)       | Hazard ratios for Migraine without Aura |         |                             |         |
|------------------------------------|--------------------------------|----------------------------|------------------------|-----------------------|-----------------------------------------|---------|-----------------------------|---------|
|                                    |                                |                            |                        |                       | Crude                                   | P-value | Overlap weighted<br>model † | P-value |
| Underweight                        |                                |                            |                        |                       |                                         |         |                             |         |
| CKD                                | 8 / 399 (2.01)                 | 1,220                      | 6.56                   | 1.58 (-2.72 to 5.88)  | 1.18 (0.56-2.51)                        | 0.666   | 1.26 (0.72-2.21)            | 0.426   |
| Control                            | 44 / 2,006 (2.19)              | 8,840                      | 4.98                   |                       | 1                                       |         | 1                           |         |
| Normal weight                      |                                |                            |                        |                       |                                         |         |                             |         |
| CKD                                | 102 / 4,735 (2.15)             | 19,233                     | 5.30                   | -0.27 (-1.40 to 0.87) | 0.92 (0.74-1.13)                        | 0.416   | 0.96 (0.82-1.12)            | 0.579   |
| Control                            | 628 / 22,085 (2.84)            | 112,776                    | 5.57                   |                       | 1                                       |         | 1                           |         |
| Overweight                         |                                |                            |                        |                       |                                         |         |                             |         |
| CKD                                | 90 / 4,032 (2.23)              | 18,083                     | 4.98                   | -0.89 (-2.11 to 0.31) | 0.83 (0.66-1.03)                        | 0.097   | 0.83 (0.70-0.98)            | 0.03*   |
| Control                            | 511 / 16,509 (3.10)            | 86,991                     | 5.87                   |                       | 1                                       |         | 1                           |         |
| Obese                              |                                |                            |                        |                       |                                         |         |                             |         |
| CKD                                | 133 / 6,277 (2.12)             | 26,705                     | 4.98                   | -0.32 (-1.29 to 0.65) | 0.90 (0.75-1.09)                        | 0.298   | 0.90 (0.77-1.05)            | 0.183   |
| Control                            | 584 / 21,172 (2.76)            | 110,158                    | 5.30                   |                       | 1                                       |         | 1                           |         |
| Non-smoker                         |                                |                            |                        |                       |                                         |         |                             |         |
| CKD                                | 237 / 9,726 (2.44)             | 42,605                     | 5.56                   | -0.61 (-1.42 to 0.20) | 0.88 (0.76-1.01)                        | 0.06    | 0.89 (0.80-0.99)            | 0.04*   |
| Control                            | 1,283 / 39,481 (3.25)          | 207,896                    | 6.17                   |                       | 1                                       |         | 1                           |         |
| Past and current smoker            |                                |                            |                        |                       |                                         |         |                             |         |
| CKD                                | 96 / 5,717 (1.68)              | 22,636                     | 4.24                   | -0.13 (-1.07 to 0.82) | 0.93 (0.75-1.16)                        | 0.505   | 0.92 (0.78-1.09)            | 0.353   |
| Control                            | 484 / 22,291 (2.17)            | 110,869                    | 4.37                   |                       | 1                                       |         | 1                           |         |
| Alcohol consumption <1 time a week |                                |                            |                        |                       |                                         |         |                             |         |
| CKD                                | 260 / 11,104 (2.34)            | 47,836                     | 5.44                   | -0.63 (-1.40 to 0.13) | 0.86 (0.76-0.99)                        | 0.031*  | 0.88 (0.79-0.98)            | 0.017*  |
| Control                            | 1,346 / 42,476 (3.17)          | 221,745                    | 6.07                   |                       | 1                                       |         | 1                           |         |
| Alcohol consumption ≥1 time a week |                                |                            |                        |                       |                                         |         |                             |         |
| CKD                                | 73 / 4,339 (1.68)              | 17,405                     | 4.19                   | -0.15 (-1.21 to 0.91) | 0.94 (0.73-1.20)                        | 0.621   | 0.99 (0.82-1.19)            | 0.881   |
| Control                            | 421 / 19,296 (2.18)            | 97,020                     | 4.34                   |                       | 1                                       |         | 1                           |         |
| SBP < 140 mmHg and DBP < 90 mmHg   |                                |                            |                        |                       |                                         |         |                             |         |
| CKD                                | 212 / 10,098 (2.10)            | 41,071                     | 5.16                   | -0.52 (-1.31 to 0.27) | 0.88 (0.76-1.01)                        | 0.073   | 0.88 (0.79-0.98)            | 0.019*  |
| Control                            | 1,281 / 44,849 (2.86)          | 225,416                    | 5.68                   |                       | 1                                       |         | 1                           |         |
| SBP ≥ 140 mmHg or DBP ≥ 90 mmHg    |                                |                            |                        |                       |                                         |         |                             |         |
| CKD                                | 121 / 5,345 (2.26)             | 24,170                     | 5.01                   | -0.20 (-1.22 to 0.82) | 0.93 (0.76-1.13)                        | 0.472   | 0.95 (0.81-1.13)            | 0.568   |
| Control                            | 486 / 16,923 (2.87)            | 93,349                     | 5.21                   |                       | 1                                       |         | 1                           |         |
| Fasting blood glucose < 100 mg/dL  |                                |                            |                        |                       |                                         |         |                             |         |
| CKD                                | 179 / 7,168 (2.50)             | 32,734                     | 5.47                   | -0.60 (-1.51 to 0.30) | 0.87 (0.74-1.02)                        | 0.086   | 0.86 (0.77-0.96)            | 0.008*  |
| Control                            | 1,152 / 34,115 (3.38)          | 189,679                    | 6.07                   |                       | 1                                       |         | 1                           |         |
| Fasting blood glucose ≥ 100 mg/dL  |                                |                            |                        |                       |                                         |         |                             |         |

|                               |                     |         |      |                       |                  |        |                  |       |
|-------------------------------|---------------------|---------|------|-----------------------|------------------|--------|------------------|-------|
| CKD                           | 154 / 8,275 (1.86)  | 32,507  | 4.74 | -0.02 (-0.87 to 0.81) | 0.97 (0.81-1.15) | 0.71   | 0.98 (0.85-1.14) | 0.831 |
| Control                       | 615 / 27,657 (2.22) | 129,086 | 4.76 |                       | 1                |        | 1                |       |
| Total cholesterol < 200 mg/dL |                     |         |      |                       |                  |        |                  |       |
| CKD                           | 192 / 9,557 (2.01)  | 37,522  | 5.12 | -0.30 (-1.11 to 0.52) | 0.91 (0.78-1.06) | 0.224  | 0.94 (0.83-1.06) | 0.298 |
| Control                       | 962 / 36,303 (2.65) | 177,630 | 5.42 |                       | 1                |        | 1                |       |
| Total cholesterol ≥ 200 mg/dL |                     |         |      |                       |                  |        |                  |       |
| CKD                           | 141 / 5,886 (2.40)  | 27,719  | 5.09 | -0.61 (-1.58 to 0.35) | 0.87 (0.73-1.04) | 0.125  | 0.88 (0.77-1.01) | 0.063 |
| Control                       | 805 / 25,469 (3.16) | 141,135 | 5.70 |                       | 1                |        | 1                |       |
| CCI scores = 0                |                     |         |      |                       |                  |        |                  |       |
| CKD                           | 107 / 4,527 (2.36)  | 21,156  | 5.06 | -0.05 (-1.07 to 0.97) | 0.97 (0.80-1.19) | 0.785  | 0.98 (0.86-1.11) | 0.732 |
| Control                       | 911 / 33,694 (2.70) | 178,319 | 5.11 |                       | 1                |        | 1                |       |
| CCI scores = 1                |                     |         |      |                       |                  |        |                  |       |
| CKD                           | 53 / 2,613 (2.03)   | 10,586  | 5.01 | -1.05 (-2.64 to 0.54) | 0.80 (0.60-1.06) | 0.121  | 0.83 (0.67-1.03) | 0.083 |
| Control                       | 351 / 11,149 (3.15) | 57,916  | 6.06 |                       | 1                |        | 1                |       |
| CCI scores ≥ 2                |                     |         |      |                       |                  |        |                  |       |
| CKD                           | 173 / 8,303 (2.08)  | 33,499  | 5.16 | -0.96 (-1.93 to 0.02) | 0.81 (0.68-0.97) | 0.018* | 0.86 (0.73-1.01) | 0.06  |
| Control                       | 505 / 16,929 (2.98) | 82,530  | 6.12 |                       | 1                |        | 1                |       |

Abbreviation: CKD, chronic kidney disease; IR, incidence rate; IRD, incidence rate difference; PY, person-year; HR, hazard ratio; CI, confidence interval

\*Significance at  $p < 0.05$ . †Adjusted for age, sex, income, region of residence, obesity, smoking, alcohol consumption, systolic blood pressure, diastolic blood pressure, fasting blood glucose, total cholesterol, and Charlson Comorbidity Index scores
